# Supplementary material
Source: publisher figshare collection journal article supplement (https://asha.figshare.com/ndownloader/files/14498165)
Supplement: Supplementary file 1 [file 14498165]

# **Supplemental Material S1. Participant IQ and language measures.**

| <b>All participants</b>                                         | <b>N</b>             | <b>General information</b>                                                                                                                                                                                                      |
|-----------------------------------------------------------------|----------------------|---------------------------------------------------------------------------------------------------------------------------------------------------------------------------------------------------------------------------------|
| School Placement                                                | All                  | Enrollment in mainstream classroom                                                                                                                                                                                              |
| Hearing Status                                                  | All                  | Passed pure tone screening test administered by school personnel                                                                                                                                                                |
| Primary Spoken Language                                         | All                  | Monolingual English speaker                                                                                                                                                                                                     |
| Behavioral/Emotional Status                                     | All                  | No formal diagnosis of emotional or behavior disorder                                                                                                                                                                           |
| Race                                                            | 114 DLD reporting    | Distribution: White 85%, African American 3%, Latino 9%, Pacific Islander 2%, Native American Mixed 1%                                                                                                                          |
|                                                                 | 89 typical reporting | Distribution: White 95.5%, Latino 4%, Native American less than 1%                                                                                                                                                              |
|                                                                 |                      |                                                                                                                                                                                                                                 |
| <b>Participants with DLD</b>                                    | <b>n</b>             | <b>General information</b>                                                                                                                                                                                                      |
| Speech-Language Services                                        | All                  | Enrollment in language intervention (pull out service delivery model)                                                                                                                                                           |
|                                                                 |                      |                                                                                                                                                                                                                                 |
| <b>Individual Testing from various studies</b>                  |                      | <b>Language testing to establish or document DLD</b>                                                                                                                                                                            |
| Fujiki, Brinton, Morgan, & Hart (1999)                          | 25                   | Current language testing in child's school file (CELF-R, TOLD-2 Primary, TOLD-2 Intermediate, combination of the PPVT-R, CELF, PLS-3, Language Processing Test)                                                                 |
| Fujiki, Brinton & Clarke (2002)                                 | 38                   | CELF-R, TOLD-2                                                                                                                                                                                                                  |
| Fujiki, Spackman, Brinton, & Hall (2004)                        | 43                   | CASL                                                                                                                                                                                                                            |
| Brinton, Spackman, Fujiki & Ricks (2007)                        | 19                   | CASL, TOLD-P (for 1 participant)                                                                                                                                                                                                |
| Brinton, Fujiki, Quist Hurst, Rowberry Jones, & Spackman (2015) | 22                   | CASL                                                                                                                                                                                                                            |
| Other                                                           | 26                   | CASL, CELF-5                                                                                                                                                                                                                    |
|                                                                 |                      |                                                                                                                                                                                                                                 |
|                                                                 |                      | <b>IQ Testing to Eliminate Intellectual Disability</b>                                                                                                                                                                          |
| Fujiki et al. (1999)                                            | 25                   | Current testing in child's school file (WISC-R, WISC-III, WPPSI, Matrix Analogies Test, KABC, Leiter-R, Stanford-Binet Intelligence Scale-3rd Edition, Woodcock-Johnson)                                                        |
| Fujiki et al. (2002)                                            | 38                   | Current testing in child's school file; in cases where testing had not been done, the WISC-III was administered                                                                                                                 |
| Fujiki et al. (2004)                                            | 43                   | Current testing in child's school file (WISC-III, Matrix Analogies Test, KABC, Leiter-R, Stanford-Binet Intelligence Scale-4th Edition, Woodcock-Johnson); in cases where testing was not available the TONI-2 was administered |

|                       |    |                                                                               |
|-----------------------|----|-------------------------------------------------------------------------------|
| Brinton et al. (2007) | 19 | UNIT <sup>20</sup>                                                            |
| Brinton et al. (2015) | 22 | UNIT                                                                          |
| Other                 | 26 | Current testing in the child’s school file (WISC-III, KABC, Woodcock-Johnson) |

*Note.* CELF-R = Clinical Evaluation of Language Fundamentals–Revised (Semel, Wiig, & Secord, 1987); TOLD-2 Primary: Test of Language Development–2: Primary (Newcomer & Hammill, 1988); TOLD-2 Intermediate: Test of Language Development–2: Intermediate (Hammill & Newcomer, 1988); PPVT-R = Peabody Picture Vocabulary Test–Revised (Dunn & Dunn, 1981); CELI = Carrow Elicited Language Inventory (Carrow, 1974); PLS-3 = Preschool Language Scale–Third Edition (Zimmerman, Steiner, & Pond, 1992); Language Processing Test (Richard & Hanner, 1985); CASL = The Comprehensive Assessment of Spoken Language (Carrow-Woolfolk, 1999); CELF-5 = Clinical Evaluation of Language Fundamentals–5th (Wiig, Semel, & Secord, 2013); WISC-R = Wechsler Intelligence Scale for Children–Revised (Wechsler, 1974); WISC-III = Wechsler Intelligence Scale for Children–Third Edition (Wechsler, 1991); WPPSI = Wechsler Preschool and Primary Scale of Intelligence (Wechsler, 1998); Matrix Analogies Test (Naglieri, 1985); KABC = Kaufman Assessment Battery for Children (Kaufman & Kaufman, 1983); Leiter-R = Leiter International Performance Scale–Revised (Roid & Miller, 2002); Stanford-Binet Intelligence Scale–3rd Edition (Terman & Merrill, 1973); Woodcock-Johnson Psycho-Educational Battery–Revised (Woodcock, Johnson, & Mather, 1990); Stanford-Binet Intelligence Scale–4th Edition (Thorndike, Hagen, & Sattler, 1986); TONI-2 = Test of Nonverbal Intelligence–Second Edition (Brown, Sherbenou, & Johnsen, 1990); UNIT = Universal Nonverbal Intelligence Test (Bracken & McCallum, 1998).

## References

- Bracken, B. A., & McCallum, R. S. (1998). *Universal Nonverbal Intelligence Test*. Itasca, IL: Riverside Publishing.
- Brown, L., Sherbenou, R. J., & Johnsen, S. K. (1990). *Test of Nonverbal Intelligence*. Austin, TX: Pro-Ed.
- Carrow, E. (1974). *Elicited Language Inventory*. Austin, TX: Learning Concepts.
- Carrow-Woolfolk, E. (1999). *The Comprehensive Assessment of Spoken Language*. Moline, IL: Linguisticsystems.
- Dunn, L. M., & Dunn, L. M. (1981). *Peabody Picture Vocabulary Test–Revised*. Circle Pines, MN: American Guidance Service.
- Hammill, D. D., & Newcomer, P. L. (1988). *Test of Language Development–2: Intermediate*. Austin, TX: Pro-Ed.
- Kaufman, A. S., & Kaufman, N. L. (1983). *Kaufman Assessment Battery for Children*. Hoboken, NJ: Wiley Online Library.
- Naglieri, J. A. (1985). *Matrix Analogies Test: Expanded form*. Columbus, OH: Merrill.
- Newcomer, P. L., & Hammill, D. D. (1988). *Test of Language Development– 2: Primary*. Austin, TX: Pro-Ed.
- Richard, G. J., & Hanner, M. A. (2005). *Language Processing Test: Elementary*. East Moline, IL: Linguisticsystems.
- Roid, G. H., & Miller, L. J. (2002). *Leiter-R: Leiter International Performance Scale–Revised*. Wood Dale, IL: Stoelting.
- Semel, E., Wiig, E., & Secord, W. (1987). *Clinical Evaluation of Language Fundamentals–Revised*. San Diego, CA: Psychological Corp.
- Terman, L. M., & Merrill, M. A. (1973). *Stanford-Binet Intelligence Scale: Manual for the Third Revision Form*. Boston, MA: Houghton Mifflin.
- Thorndike, R. L., Hagen, E. P., & Sattler, J. M. (1986). *Stanford-Binet Intelligence Scale*. Rolling Meadows, IL: Riverside Publishing Company.
- Wechsler, D. (1974). *WISC-R, Wechsler Intelligence Scale for Children, Revised*. New York, NY: Psychological.
- Wechsler, D. (1989). *Wechsler Preschool and Primary Scale of Intelligence–Revised*. San Antonio, TX: Psychological Corporation.
- Wechsler, D. (1991). *WISC-III: Wechsler Intelligence Scale for Children*. San Antonio, TX: Psychological, Harcourt Brace Jovanovich.
- Wechsler, D. (2004). *WISC-IV: Wechsler Intelligence Scale for Children: Technical and Interpretive Manual*. San Antonio, TX: Psychological Corporation.
- Wechsler, D., Coalson, D. L., & Raiford, S. E. (1997). *WAIS-III: Wechsler Adult Intelligence Scale*. San Antonio, TX: Psychological Corporation.
- Wiig, E. H., Secord, W. A., & Semel, E. (2013). *Clinical Evaluation of Language Fundamentals–5th Edition: CELF-5*. Toronto, Canada: Pearson.
- Woodcock, R. W., Johnson, M. B., & Mather, N. (1990). *Woodcock-Johnson Psycho-Educational Battery–Revised*. Rolling Meadows, IL: Riverside.
- Zimmerman, I. L., Steiner, V. G., & Pond, R. E. (1992). *PLS-3: Preschool Language Scale-3*. San Antonio: The Psychological Corporation/Harcourt Brace Jovanovich.
